# Supplementary material for: Investigation of Commensal Escherichia coli Populations of Cormorant Hatchlings in the Absence of Anthropogenic Impacts in Remote Areas of West Mongolia
Source: Microorganisms. 2021 Feb 12;9(2):372. doi: 10.3390/microorganisms9020372 (PMC7917637; doi:10.3390/microorganisms9020372)
Supplement: Supplementary file 1 [file microorganisms-09-00372-s001.xlsx]

## Sheet: Table S1
Table S1. Antimicrobial susceptibility testing of E. coli isolated from cormorants
	Isolate Identification Number	amikacin	amox/clav.	ampicillin	amp/sulbactam	cefalexin	cefazolin	cefotaxim	ceftazidim	cefoxitin	cefuroxim	chloramphenicol	ciprofloxacin	doxycyclin	enrofloxacin	kanamycin	gentamicin	imipenem	levofloxacin	meropenem	neomycin	piperac/tazobac	streptomycin	Sulfamethoxazol	sulfa-trimethop	tetracycline	ticarcillin	tobramycin	trimethoprim
PFGE Type		AK	AMC	AMP	SAM	CL	KZ	CTX	CAZ	FOX	CXM	C	CIP	DO	ENR	K	CN	IPM	LEV	MEM	N	TZP	S	S3	SXT	TE	TIC	TOB	TMP/W		Resistant	Intermediate	Sensitive	Total
Control	ATCC 25922	22	16	13	15	17	23	32	25	22	20	21	38	19	29	17	20	30	34	32	18	21	12	24	27	22	25	18	27	ATCC 25922	1	3	24	28
1	7887	20	15	16	17	19	20	30	24	22	22	22	30	19	31	19	17	26	28	29	14	22	12	24	26	22	25	16	25	7887	0	4	24	28
2	7888	18	16	17	17	18	21	26	22	22	20	25	28	19	28	17	17	25	20	23	14	22	13	25	26	19	22	15	28	7888	0	4	24	28
3	7889	18	15	16	18	17	21	28	24	23	21	24	30	22	30	19	17	25	30	29	15	25	13	24	30	22	25	17	30	7889	0	4	24	28
4	7890	17	16	15	17	15	19	26	22	24	19	24	28	16	25	17	15	23	26	25	15	24	14	22	25	23	22	16	26	7890	0	6	22	28
5	7891	20	15	14	17	17	21	28	24	22	20	24	30	18	27	19	17	28	30	30	16	26	15	24	25	22	27	16	26	7891	0	3	25	28
6	7893	20	18	15	15	17	21	30	25	25	21	23	30	18	26	17	18	25	26	29	16	26	14	22	25	21	26	17	26	7893	0	4	24	28
7	7894	21	17	16	17	20	23	30	25	23	21	27	33	20	29	19	19	30	34	31	14	22	15	22	28	23	27	19	30	7894	0	3	25	28
8	7895	23	15	13	16	17	21	27	24	22	20	25	31	21	29	22	22	26	32	30	16	21	17	25	27	24	24	20	28	7895	1	2	25	28
9	7897	21	14	14	16	16	21	30	25	21	19	26	31	19	31	20	17	28	30	30	17	25	15	24	28	22	24	17	27	7897	0	3	25	28
10	7899	21	14	11	14	16	22	30	25	24	20	24	33	19	30	22	21	28	31	30	17	22	15	27	26	22	25	19	26	7899	1	3	24	28
11	7900	20	15	14	15	17	21	30	25	22	22	26	32	19	29	20	19	29	29	29	16	28	15	27	28	24	29	19	30	7900	0	3	25	28
12	7902	21	17	15	15	17	20	29	26	23	21	28	31	20	31	21	20	29	30	28	18	23	15	26	27	21	26	19	23	7902	0	2	26	28
13	7903	20	16	14	15	18	21	28	22	20	19	23	34	20	34	19	18	29	32	31	16	26	14	25	26	21	25	17	29	7903	0	4	24	28
14	7906	20	15	14	14	16	22	29	25	24	21	23	30	20	30	21	21	29	31	31	18	28	12	30	22	25	28	19	29	7906	0	5	23	28
15	7907	22	16	14	17	18	22	34	26	24	23	25	30	20	32	21	20	30	29	33	20	31	16	31	31	23	27	20	31	7907	0	2	26	28
16	7909	22	15	14	17	18	22	29	25	25	21	25	32	17	32	20	20	30	28	30	17	21	15	28	28	22	26	17	25	7909	0	2	26	28
17	7910	22	15	13	14	17	22	30	24	23	20	22	31	18	29	21	20	25	30	32	19	30	15	25	26	21	25	19	26	7910	1	2	25	28
18	7912	23	18	14	17	19	23	32	26	23	20	24	33	20	29	21	20	31	31	31	18	29	17	30	32	24	28	20	33	7912	0	1	27	28
19	7914	22	16	14	16	18	22	30	26	22	23	25	35	18	33	23	20	29	32	30	17	28	16	29	30	22	27	20	32	7914	0	2	26	28
20	7915	23	17	14	16	19	23	32	29	27	25	24	34	23	33	22	23	30	35	34	18	29	17	30	30	26	29	21	29	7915	0	2	26	28
21	7917	21	15	13	17	18	23	32	26	24	24	25	29	18	30	19	20	29	33	31	17	30	14	29	31	25	30	19	32	7917	1	2	25	28
22	7920	20	19	15	17	17	21	30	26	25	21	27	33	27	34	20	20	29	36	32	17	27	15	29	30	23	30	19	35	7920	0	1	27	28
23	7925	20	17	15	15	18	22	30	25	23	20	24	33	22	35	19	20	30	32	30	17	30	16	30	31	27	27	19	34	7925	0	2	26	28
24	7927	20	16	14	16	18	22	30	25	22	21	26	32	20	33	20	20	31	29	32	17	23	15	26	27	24	27	18	30	7927	0	2	26	28
25	7928	19	14	12	16	18	23	29	24	23	21	26	32	18	29	21	18	26	29	30	15	27	14	24	26	21	26	20	25	7928	1	3	24	28
26	7931	20	13	11	14	16	20	28	22	21	19	21	28	16	27	21	23	28	27	29	16	26	13	19	25	22	24	18	25	7931	2	4	22	28
27	7935	22	14	12	16	18	23	29	25	24	19	24	35	18	29	21	23	29	34	31	18	26	15	27	27	22	23	19	26	7935	1	1	26	28
28	7939	21	18	16	17	20	25	32	27	22	23	28	37	21	35	21	20	30	36	31	17	31	15	28	31	23	31	19	31	7939	0	1	27	28
29	7941	23	16	14	15	19	22	31	27	22	21	26	36	20	30	20	22	30	33	32	16	29	15	28	30	23	27	20	28	7941	0	3	25	28
30	7942	20	16	21	14	19	26	31	25	24	20	26	33	23	32	20	20	30	34	33	20	22	16	30	32	25	27	19	28	7942	0	2	26	28
31	7946	23	16	21	14	20	25	30	24	25	20	25	34	23	24	23	21	27	25	30	14	27	14	30	30	26	18	22	30	7946	0	5	23	28
32	7951	23	14	19	16	19	23	31	25	23	21	21	30	20	30	22	19	28	30	30	18	28	15	26	29	23	28	20	29	7951	0	1	27	28
33	7952	22	16	20	15	19	23	30	25	22	21	23	32	18	30	21	21	30	30	29	13	25	16	27	28	24	27	18	28	7952	0	2	26	28
34	7953	21	17	17	14	17	18	32	24	23	22	29	34	20	34	22	21	32	29	29	17	28	15	29	30	25	28	20	30	7953	0	2	26	28
35	7954	22	9	0	11	17	19	30	24	22	20	23	33	11	30	18	20	28	24	30	17	25	14	20	18	0	0	18	0	7954	7	1	20	28
36	7956	21	15	17	13	17	22	27	22	21	19	23	28	20	27	19	19	29	24	27	17	26	15	26	27	23	24	17	27	7956	0	2	26	28
37	7960	22	14	17	13	19	24	30	26	23	20	23	33	19	32	20	20	30	30	31	18	26	16	28	28	23	27	19	29	7960	0	2	26	28
38	7961	21	17	21	16	21	24	31	26	21	22	24	32	19	31	20	19	30	30	31	16	29	14	26	27	23	28	18	30	7961	0	3	25	28
39	7968	20	14	18	16	19	23	30	24	22	21	25	34	20	23	20	18	30	29	28	16	26	15	26	29	23	25	18	28	7968	0	2	26	28
40	7969	21	14	16	14	18	22	27	21	21	21	22	30	16	30	19	18	27	28	28	15	25	15	25	25	22	26	15	25	7969	0	4	24	28
41	7971	22	13	15	16	18	20	28	21	23	19	21	29	18	29	20	20	27	28	29	16	24	15	24	26	22	26	18	25	7971	1	2	25	28
42	7972	22	20	20	22	22	20	32	30	26	21	25	31	21	30	23	21	29	31	30	15	26	14	26	26	24	25	19	29	7972	0	2	26	28
43	7975	20	22	21	21	20	25	34	29	25	23	27	34	21	33	17	18	28	32	30	14	28	12	18	23	20	24	15	25	7975	0	3	25	28
44	7976	22	15	16	18	20	26	30	28	25	21	24	31	19	30	20	19	27	27	30	16	26	15	24	23	20	27	17	23	7976	0	3	25	28
45	7979	21	20	21	25	21	24	29	31	26	23	28	31	20	27	22	20	29	29	30	17	25	13	25	29	25	28	18	27	7979	0	1	27	28
46	7980	22	16	17	13	16	21	30	27	26	24	23	35	18	32	20	22	29	31	30	17	26	18	26	30	23	27	20	29	7980	0	3	25	28
47	7981	21	15	17	14	16	22	29	23	21	21	24	30	18	29	20	20	31	20	31	17	28	18	26	27	23	28	21	30	7981	0	3	25	28
48	7982	20	20	20	22	21	24	33	31	25	24	29	34	20	31	22	20	30	30	33	18	32	16	23	29	24	30	19	28	7982	0	0	28	28
49	7986	22	21	20	23	21	27	34	30	25	23	24	31	19	28	20	20	30	30	31	19	29	14	30	29	24	29	19	31	7986	0	1	27	28
50	7994	23	20	20	23	21	25	30	27	26	23	24	33	19	30	22	20	27	33	29	18	26	14	25	30	23	26	19	28	7994	0	1	27	28
51	7997	22	20	19	23	22	26	33	32	28	25	25	31	20	32	21	20	30	32	31	18	28	16	28	30	23	27	19	29	7997	0	0	28	28
52	7998	21	20	20	23	18	26	32	30	24	23	25	32	20	31	20	19	31	30	27	18	28	15	26	27	21	28	18	29	7998	0	0	28	28
53	8004	25	19	18	22	20	27	31	30	24	22	25	32	18	29	20	20	30	29	32	16	27	15	29	29	22	28	19	30	8004	0	1	27	28
54	8006	25	20	19	22	21	25	30	29	23	23	25	33	20	32	21	20	26	31	31	18	29	16	28	28	23	27	20	28	8006	0	0	28	28
55	8012	22	17	18	27	20	24	31	28	26	25	24	34	20	34	20	20	31	33	33	18	29	15	29	30	23	29	19	30	8012	0	1	27	28
56	8018	23	20	19	22	22	23	32	30	27	25	24	35	20	34	22	20	29	34	34	18	30	16	30	32	25	30	19	32	8018	0	0	28	28
57	8022	23	14	14	20	19	25	33	29	24	23	23	34	21	30	22	20	30	33	32	18	26	17	28	27	22	27	20	26	8022	0	2	26	28
58	8023	23	20	20	24	23	24	33	31	24	25	25	33	20	32	21	21	30	32	31	18	31	15	29	29	24	30	19	30	8023	0	0	28	28
59	8027	23	16	17	20	19	24	30	28	25	23	23	35	20	30	20	20	31	29	29	17	26	16	29	29	24	25	19	26	8027	0	1	27	28
60	8028	31	22	23	24	21	25	31	28	25	23	22	30	20	29	23	21	31	30	31	19	29	17	27	28	22	27	22	28	8028	0	0	28	28
							Sensitive				Intermediate					Resistant
